# Supplementary material
Source: Springer Nature journal article supplement (https://www.springermedizin.de/resource/supplementary/13014_2011_441_MOESM6_ESM.pdf/9633448)

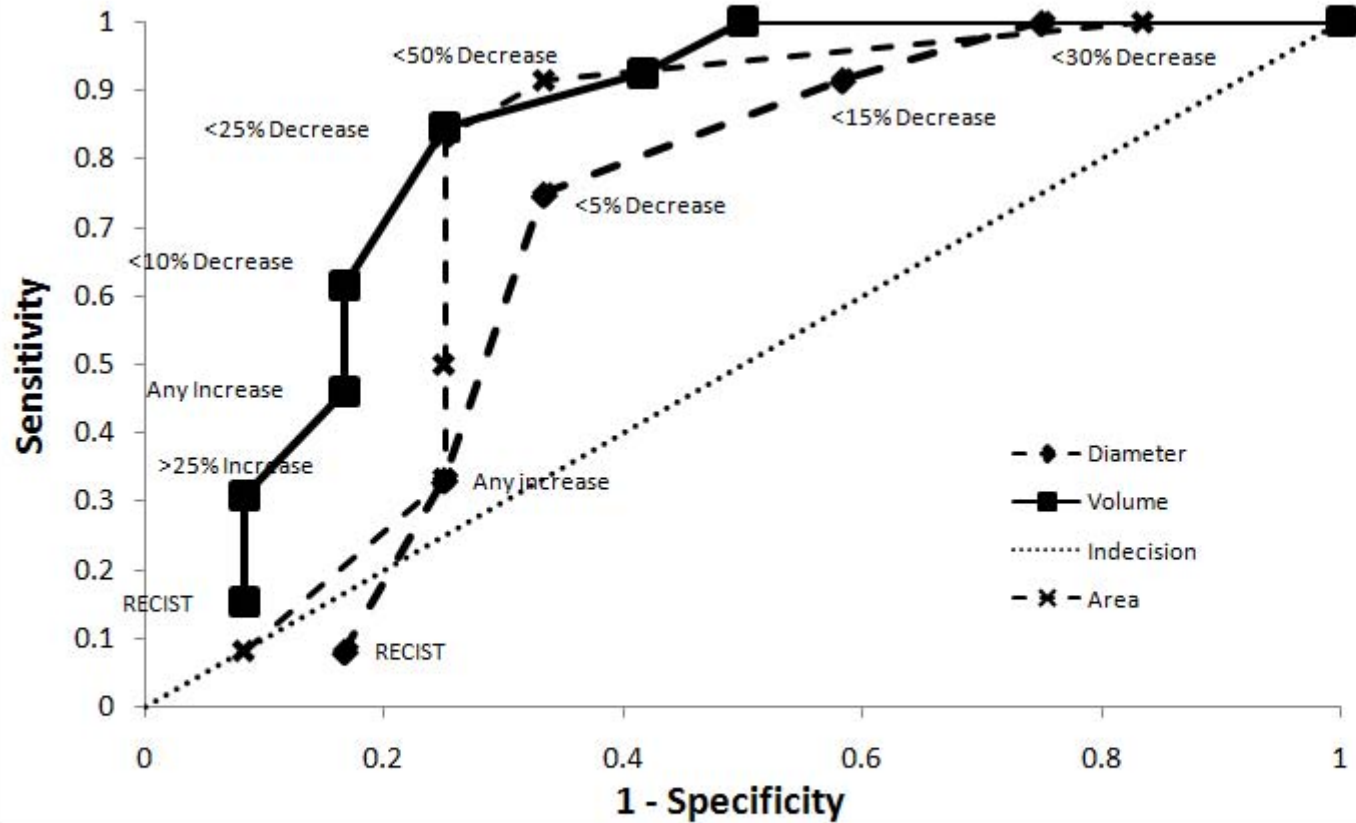

Supplement: MOESM6 [file 9633448]
